# Supplementary material for: Core-corona Co/CoP clusters strung on carbon nanotubes as a Schottky catalyst for glucose oxidation assisted H2 production
Source: Royal Society of Chemistry journal article supplement (doi:10.1039/d0ta11850h), 2021-01-01
Supplement: d0ta11850h1.pdf [file d0ta11850h1.pdf]

## Supporting Information

### **Core-Corona Co/CoP Cluster Strung on Carbon Nanotubes as Schottky Catalyst for Glucose Oxidation Assisted H<sub>2</sub> production**

Yuanyuan Zhang<sup>a</sup>, Yunfeng Qiu<sup>\*a,b</sup>, Zhuo Ma<sup>c</sup>, Yanping Wang, Yongxia Zhang<sup>a</sup>,  
Yuxin Ying<sup>d</sup>, Yinan Jiang<sup>d</sup>, Yixue Zhu<sup>d</sup> and Shaoqin Liu<sup>\*a,b</sup>

*<sup>a</sup> School of Chemistry and Chemical Engineering, Harbin Institute of Technology, No.92 West Dazhi Street, Nan Gang District, Harbin, 150001, People's Republic of China.*

*<sup>b</sup> Key Laboratory of Micro-systems and Micro-structures Manufacturing, Harbin Institute of Technology, No.2 Yikuang Street, Nan Gang District, Harbin 150080, People's Republic of China.*

*<sup>c</sup> School of Life Science and Technology, Harbin Institute of Technology, No.92 West Dazhi Street, Nan Gang District, Harbin, 150001, People's Republic of China.*

*<sup>d</sup> School of Materials Science and Engineering, Harbin Institute of Technology, Harbin, 150001, P.R. China.*

*Email address: qiuyf@hit.edu.cn (Y.F. Qiu); shaoqinliu@hit.edu.cn (S.Q. Liu)*

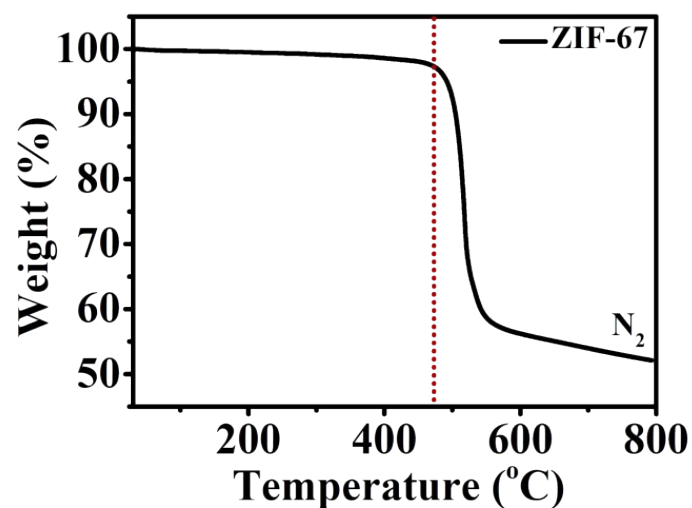

**Figure S1.** TGA curve for carbide of ZIF-67 in  $N_2$ .

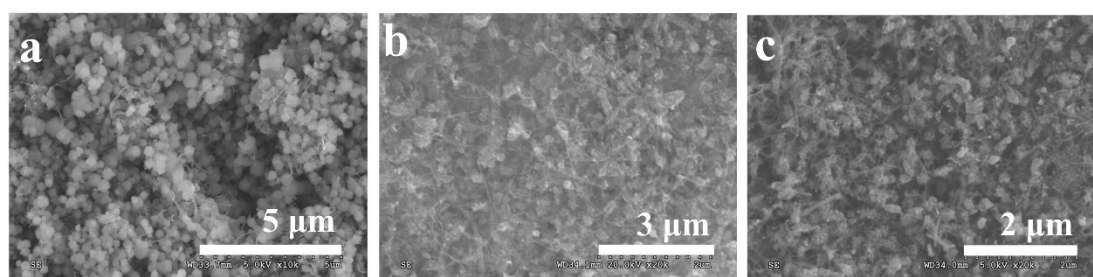

**Figure S2.** Analysis of morphologies. Low-resolution SEM images of (a) CNTs@ZIF-67, (b) CNTs@Co, and (c) CNTs@Co/CoP<sub>300mg</sub>, respectively.

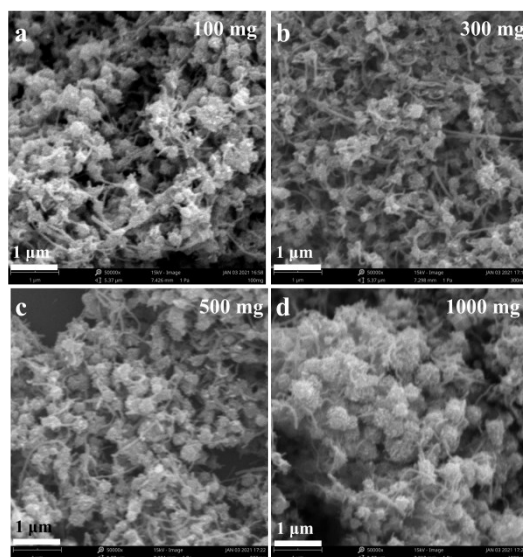

**Figure S3.** SEM images of CNTs@Co/CoP (a) 100, (b) 300, (c) 500 and (d) 1000 mg.

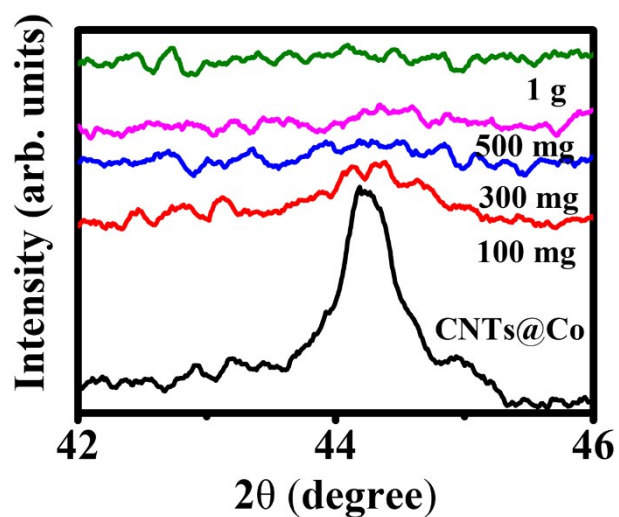

**Figure S4.** XRD patterns of CNTs@Co and CNTs@Co/CoP (100, 300, 500 and 1000 mg) in the  $2\theta$  range of  $42 \sim 46^\circ$ .

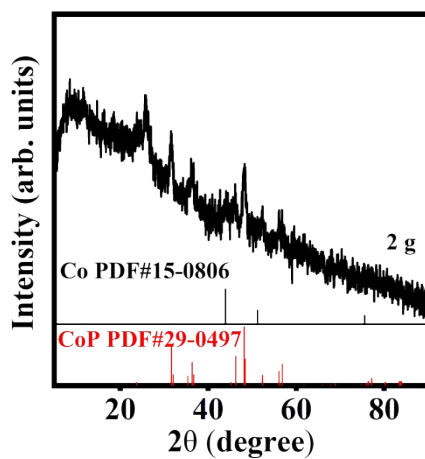

**Figure S5.** XRD pattern of CNTs@Co/CoP  $_{2g}$  in the  $2\theta$  range of  $5 \sim 90^\circ$ .

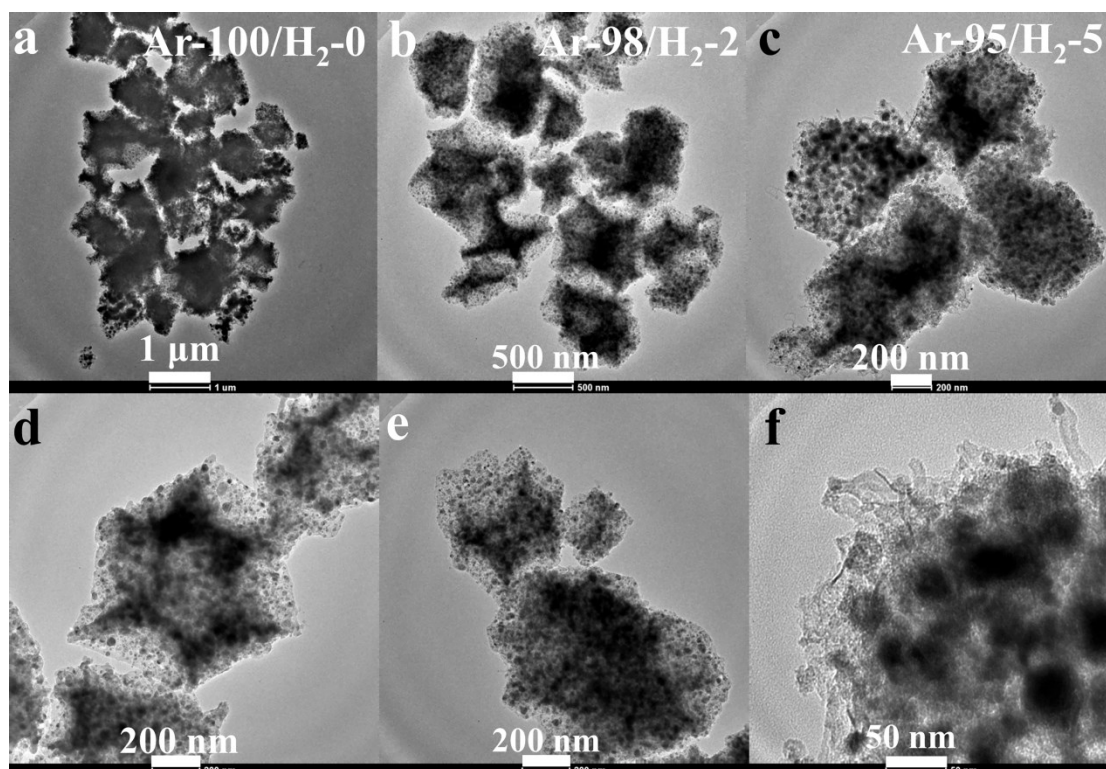

**Figure S6.** TEM images of ZIF-67 pyrolysis in different Ar/H<sub>2</sub> atmosphere. (a) Low-resolution and (d) high resolution TEM images of ZIF-67 pyrolysis in Ar/H<sub>2</sub> = 100:0 sccm. (b) Low-resolution and (e) high resolution TEM images of ZIF-67 pyrolysis in Ar/H<sub>2</sub> = 98:2 sccm. (c) Low-resolution and (f) high resolution TEM images of ZIF-67 pyrolysis in Ar/H<sub>2</sub> = 95:5 sccm.

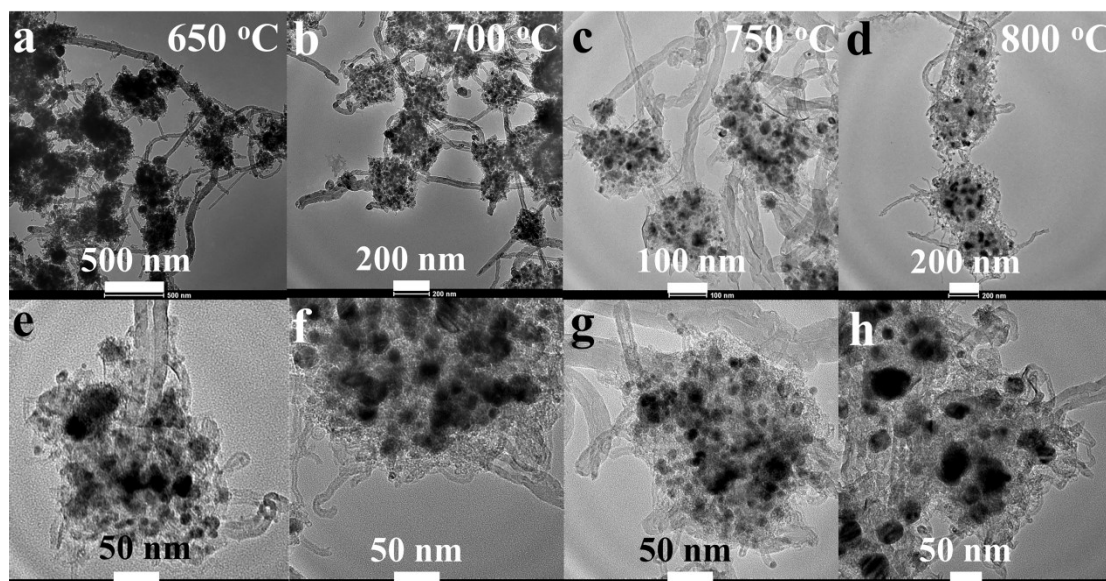

**Figure S7.** TEM images of CNTs@Co in different pyrolysis temperatures. (a) Low-resolution and (e) high resolution TEM images of 650 °C. (b) Low-resolution and (f) high resolution TEM images of 700 °C. (c) Low-resolution and (g) high resolution TEM images of 750 °C. (d) Low-resolution and (h) high resolution TEM images of 800 °C.

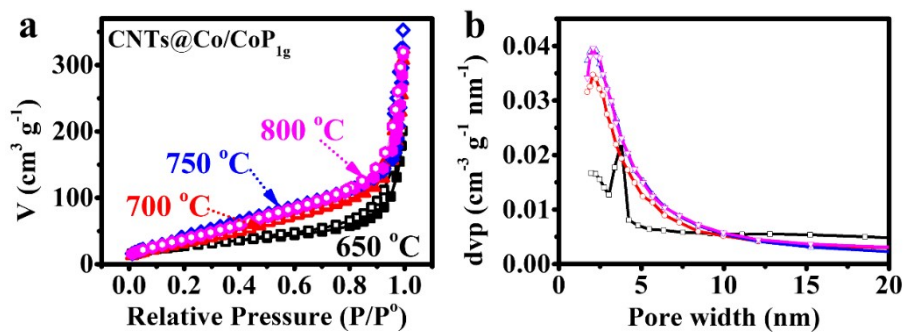

**Figure S8.** Pore size analysis. (a) Nitrogen adsorption-desorption isotherm, and (b) the corresponding pore size distribution of CNTs@Co/CoP<sub>1g</sub> (T = 650 °C, 700 °C, 750 °C and 800 °C).

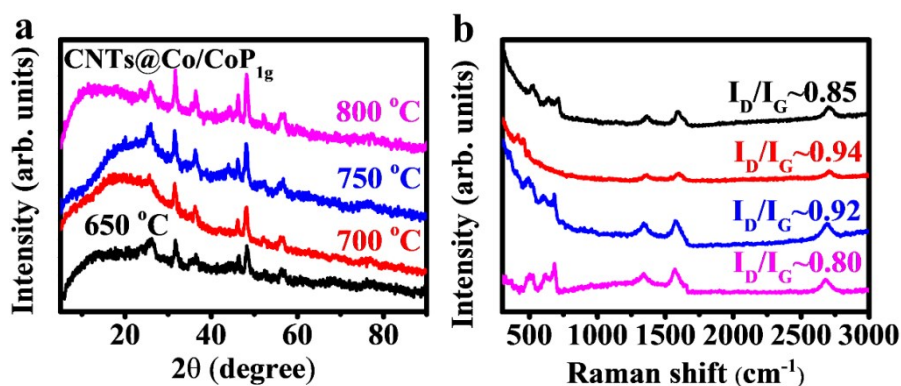

**Figure S9.** Characterization of material species and defect degree. (a) XRD patterns of CNTs@Co/CoP<sub>T</sub> (1 g) (T = 650 °C, 700 °C, 750 °C and 800 °C) (b) Raman spectra of CNTs@Co/CoP<sub>T</sub> (1 g) (T = 650 °C, 700 °C, 750 °C and 800 °C).

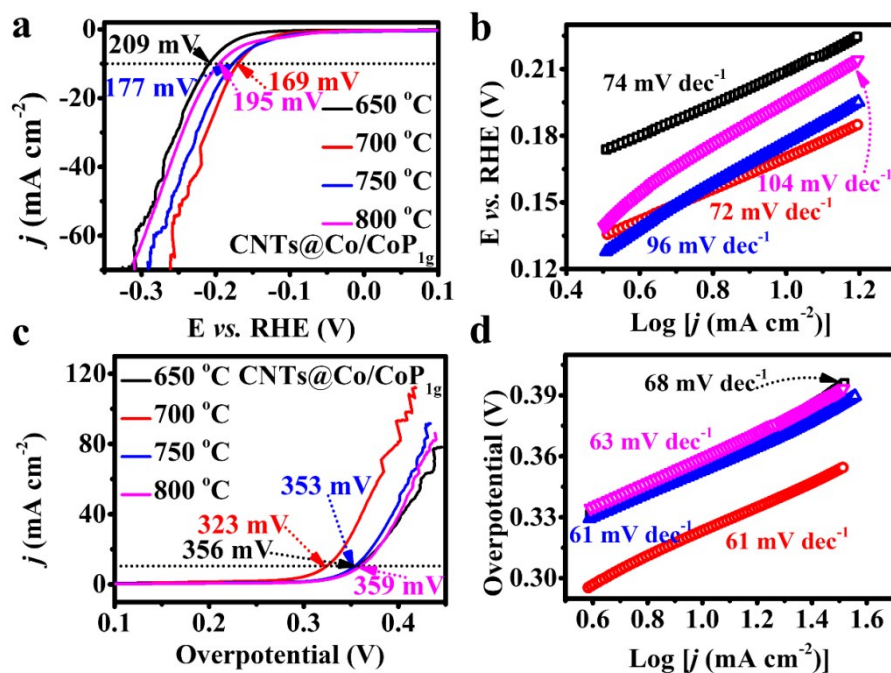

**Figure S10.** HER and OER measurements of CNTs@Co/CoP<sub>T</sub> (1 g) ( $T = 650$  °C, 700 °C, 750 °C and 800 °C) in 1.0 M KOH. (a, c) Polarization curves. All curves are recorded in N<sub>2</sub>-saturated solution at a scan rate of 5 mV s<sup>-1</sup>. (b, d) Corresponding Tafel curves.

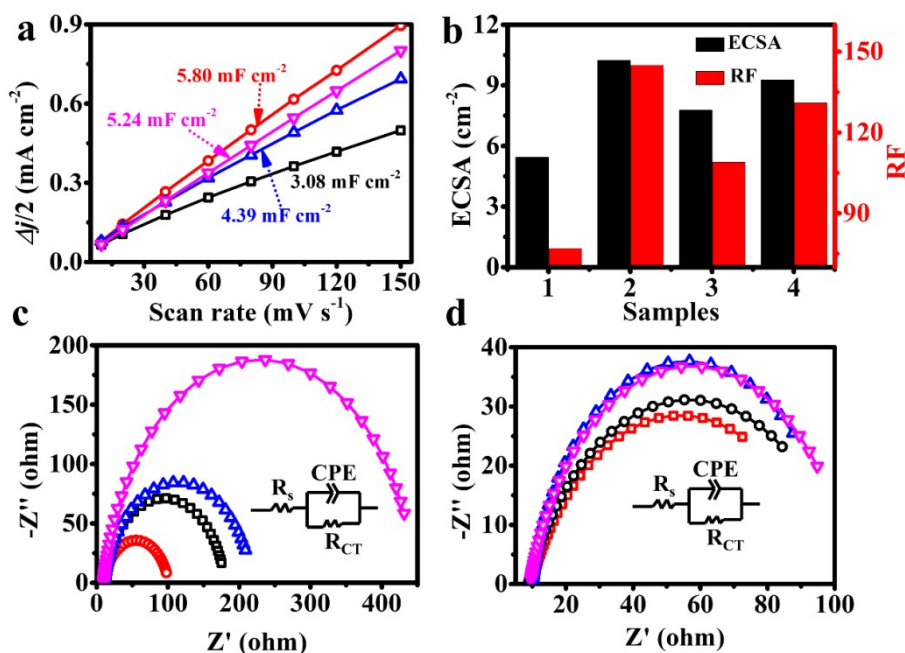

**Figure S11.** Cdl, ECSA, RF and  $R_{ct}$  analysis of CNTs@Co/CoP<sub>T</sub> (1 g) ( $T = 650$  °C, 700 °C, 750 °C and 800 °C). (a) Plots of  $\Delta j/2$  vs. scan rates, (b) ECSA and RF for different catalysts and (c, d) Nyquist plots were measured at 169 mV and 323 mV in 1.0 M KOH electrolyte for HER and OER.

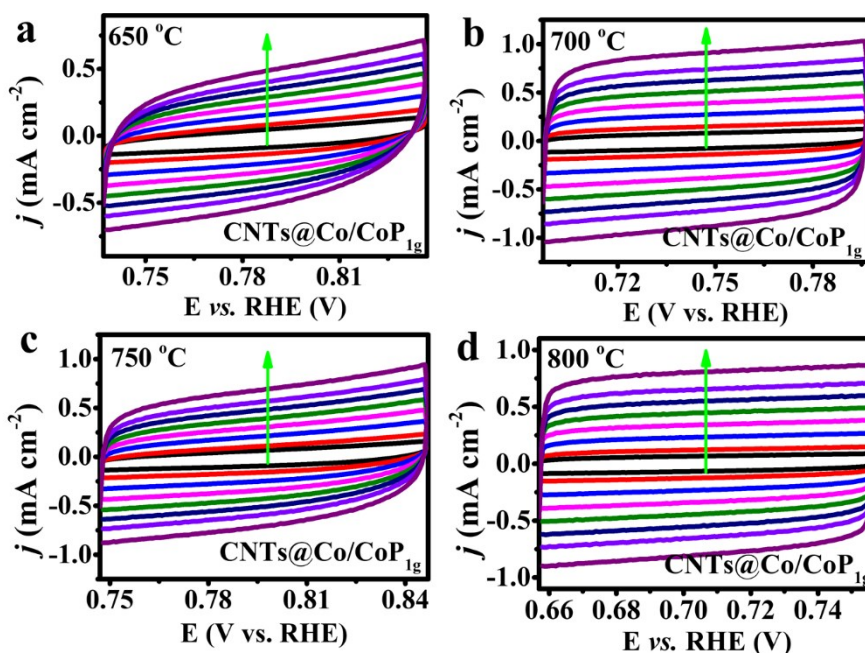

**Figure S12.** CV curves of CNTs@Co/CoP<sub>T</sub> (1 g) at (a) 650 °C, (b) 700 °C, (c) 750 °C and (d) 800 °C, respectively.

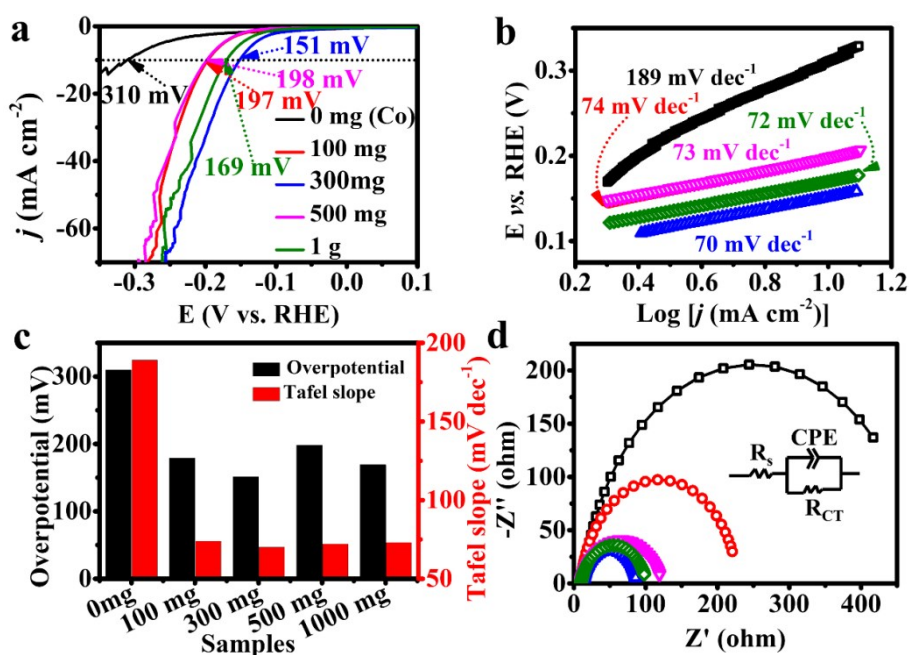

**Figure S13.** HER measurements of CNTs@Co and CNTs@Co/CoP (100 mg, 300 mg, 500 mg and 1 g). (a) Polarization curves. All curves are recorded in N<sub>2</sub>-saturated 1 M KOH solution at a scan rate of 5 mV s<sup>-1</sup>, (b) Corresponding Tafel curves, (c) Summary of overpotential at current density of 10 mA cm<sup>-2</sup> and Tafel slopes, (d) Nyquist plots measured at -151 mV.

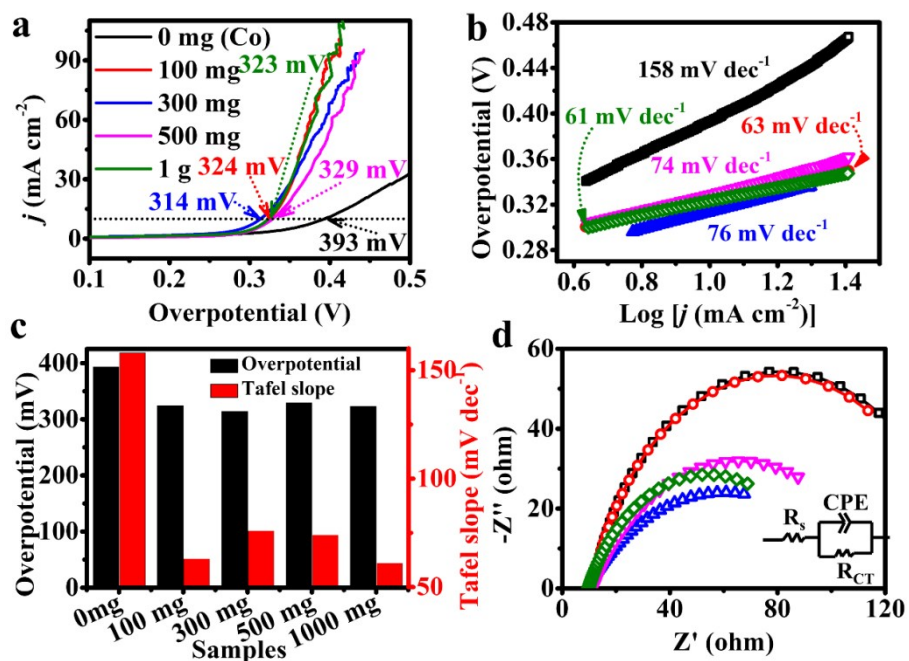

**Figure S14.** OER measurements of CNTs@Co and CNTs@Co/CoP (100 mg, 300 mg, 500 mg and 1 g). (a) Polarization curves. All curves are recorded in O<sub>2</sub>-saturated 1 M KOH solution at a scan rate of 5 mV s<sup>-1</sup>, (b) Corresponding Tafel curves, (c) Summary of overpotential at current density of 10 mA cm<sup>-2</sup> and Tafel slopes, (d) Nyquist plots measured at 314 mV.

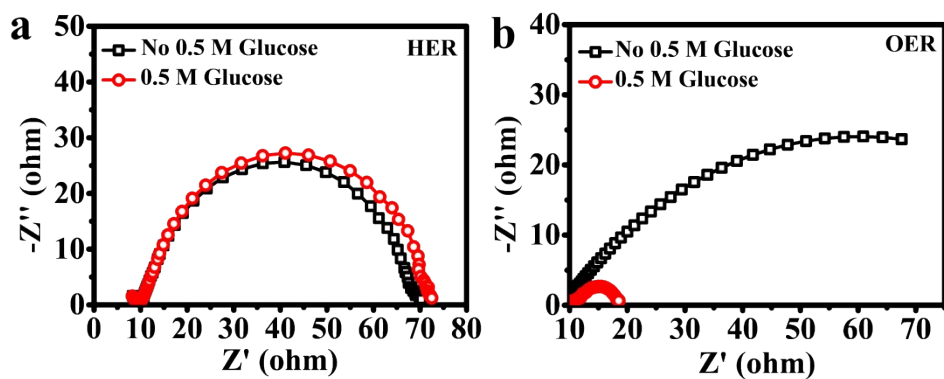

**Figure S15.** Nyquist plots with and without glucose of (a) HER and (b) OER.



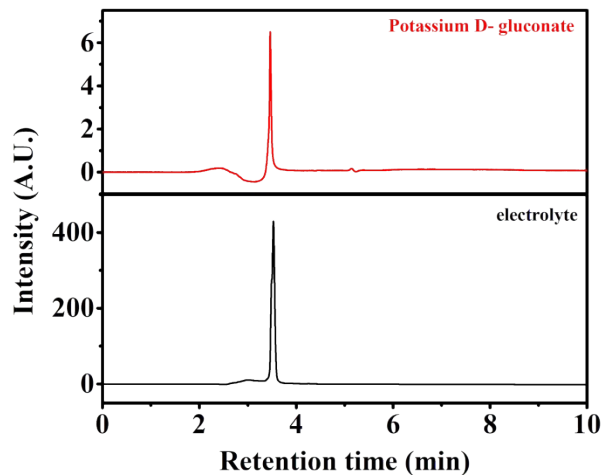

**Figure S16.** HPLC chromatograms for the electrolyte after GOR and standard solution (potassium D-gluconate).

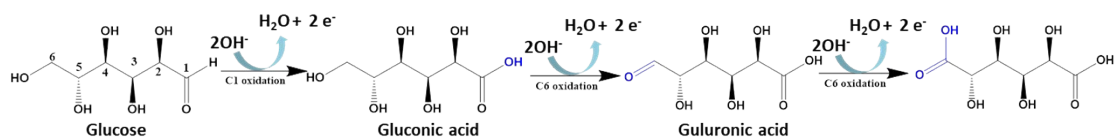

**Figure S17.** Schematic illustration of the possible pathway for the electrochemical oxidation of glucose to Gluconic acid (GNA) and Glucaric acid (GRA).

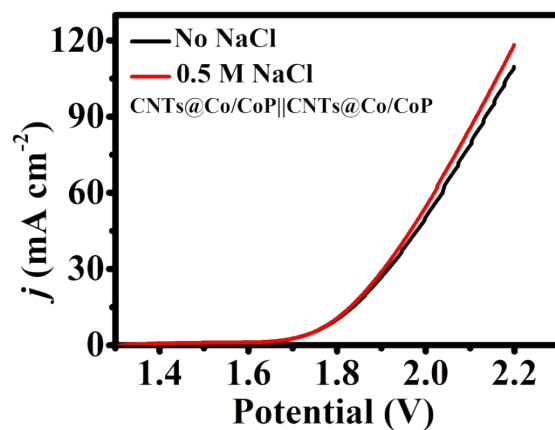

**Figure S18.** LSV curves of water electrolysis of CNTs@Co/CoP<sub>300mg</sub>||CNTs@Co/CoP<sub>300mg</sub> in 1M KOH solution without and with 0.5 M NaCl.

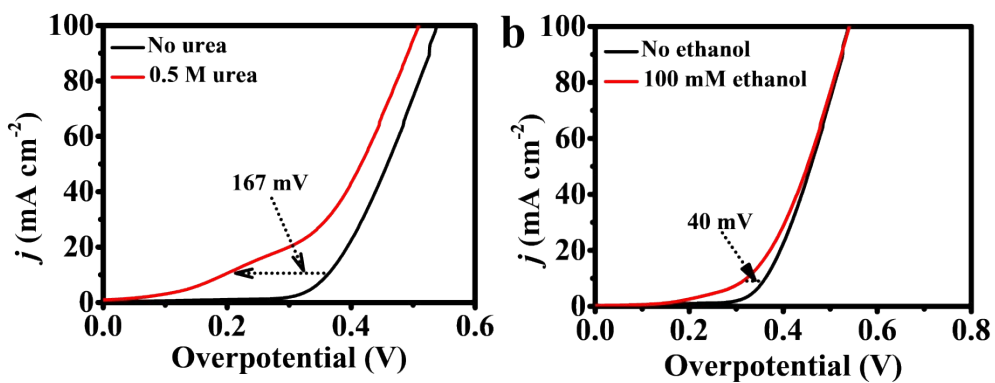

**Figure S19.** Polarization curves of OER measurements for CNTs@Co/CoP<sub>300mg</sub> in 1 M KOH solution without and with (a) 0.5 M urea and (b) 100 mM ethanol.

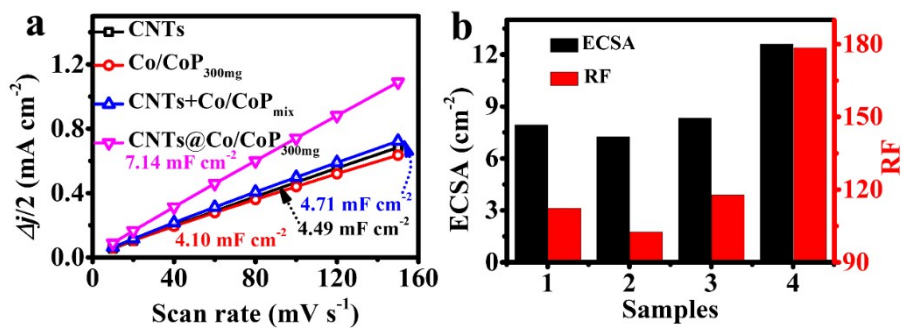

**Figure S20.** Cdl, ECSA and RF analysis of CNTs, Co/CoP, CNTs+Co/CoP<sub>mix</sub>, CNTs@Co/CoP<sub>300mg</sub>. (a) Plots of  $\Delta j/2$  vs. scan rates, (b) ECSA and RF.

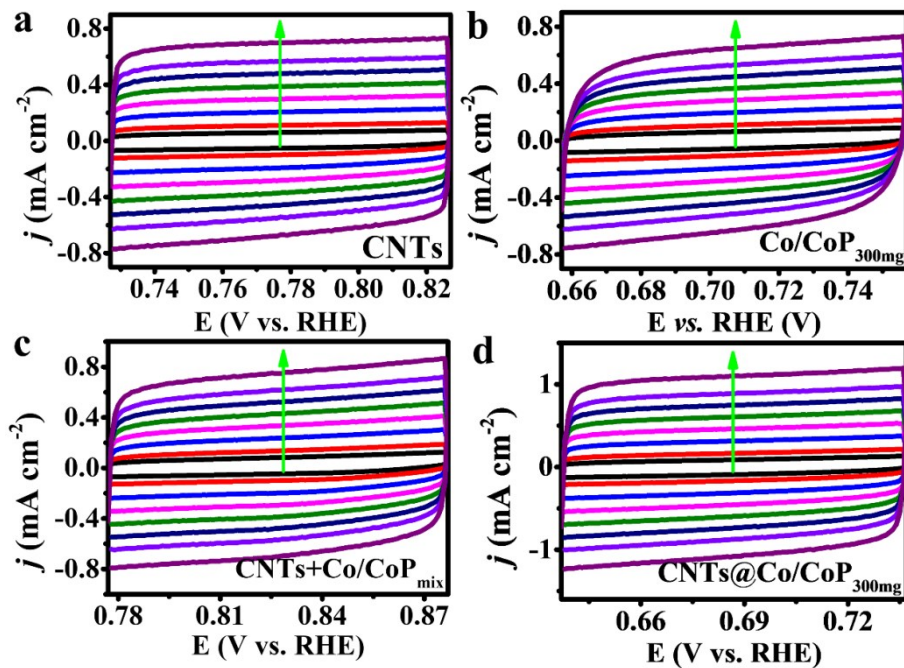

**Figure S21.** CV curves of (a) CNTs, (b) Co/CoP, (c) CNTs+Co/CoP<sub>mix</sub>, (d) CNTs@Co/CoP<sub>300mg</sub>, respectively.

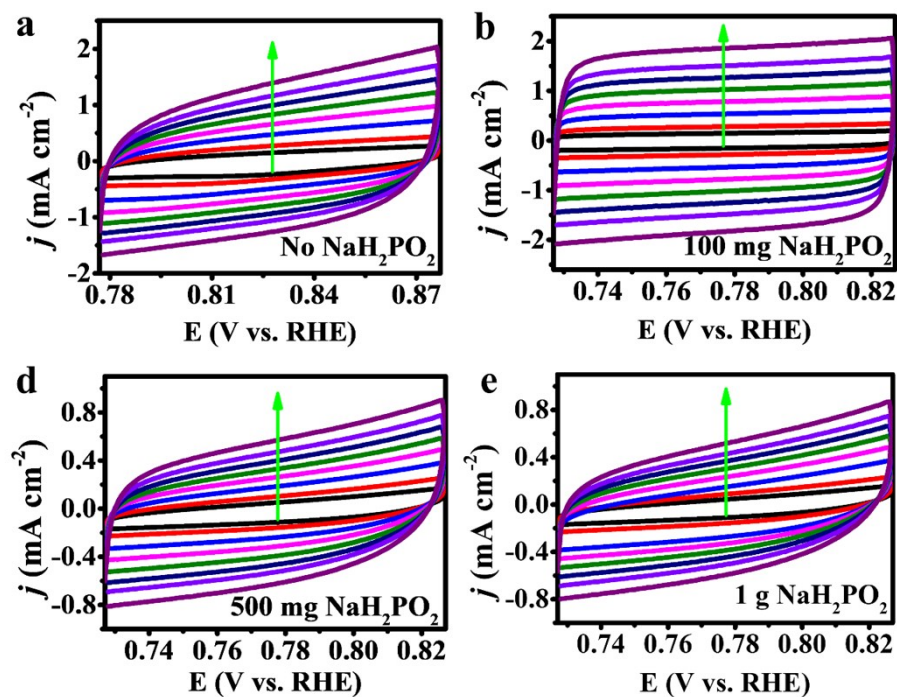

**Figure S22.** CV curves of (a) CNTs@Co, (b) CNTs@Co/CoP<sub>100mg</sub>, (c) CNTs@Co/CoP<sub>500mg</sub>, (d) CNTs@Co/CoP<sub>1g</sub>, respectively.

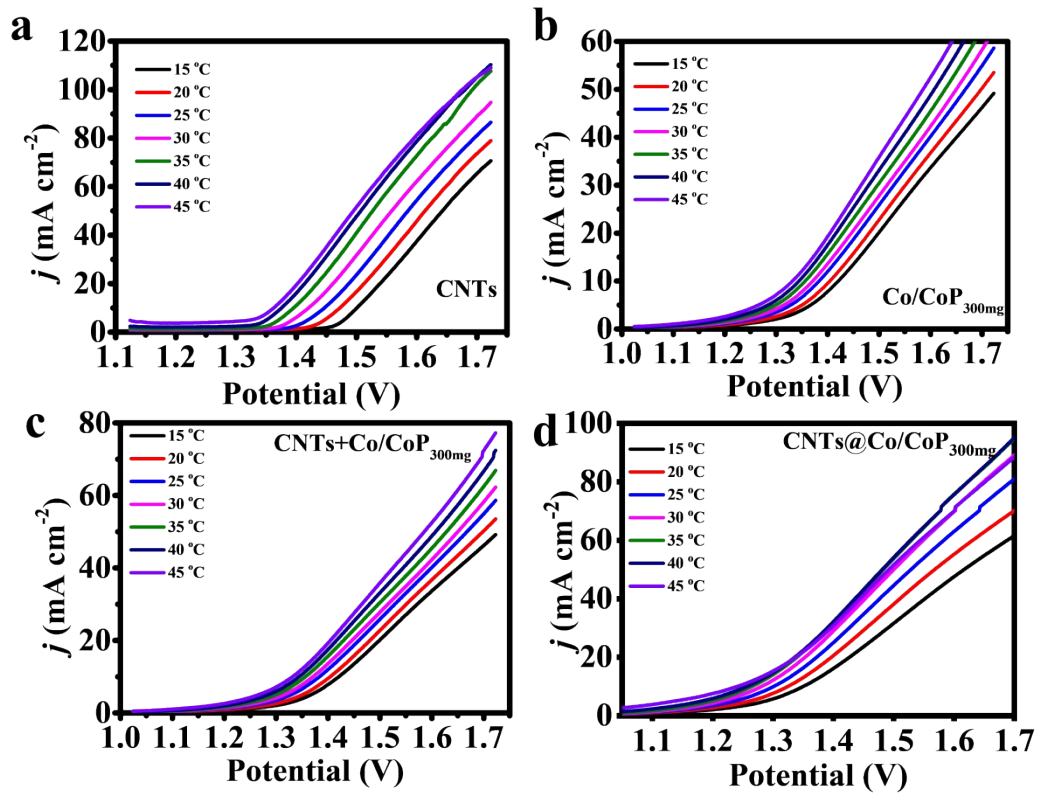

**Figure S23.** LSV curves of (a) CNTs, (b) Co/CoP<sub>300mg</sub>, (c) CNTs+Co/CoP<sub>300mg</sub>, and (d) CNTs@Co/CoP<sub>300mg</sub> in the electrolyte of 1 M KOH+0.5 M glucose at the temperature of 15°C, 20°C, 25°C, 30°C, 35°C, 40°C, and 45°C, respectively.

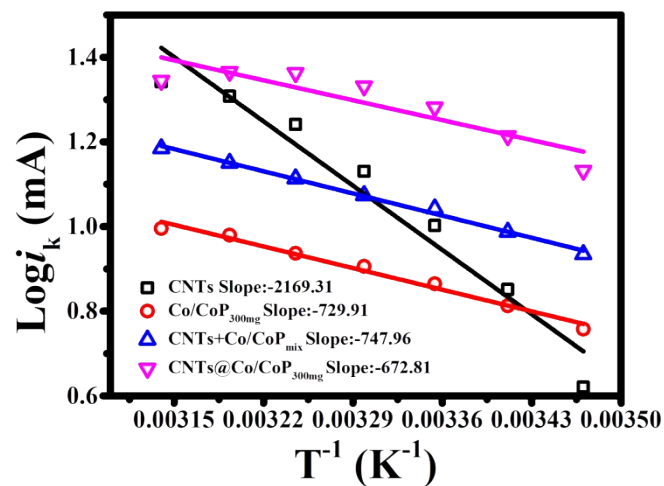

**Figure S24.** Log of the exchange current versus the inverse temperature for CNTs, Co/CoP<sub>300mg</sub>, CNTs+Co/CoP<sub>300mg</sub>, and CNTs@Co/CoP<sub>300mg</sub>.

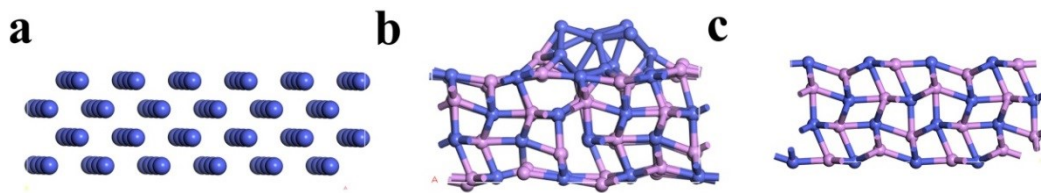

**Figure S25.** The crystal structure of (a) Co, (b) Co/CoP and (c) CoP.

**Table S1.** The average bader charge of Co in CoP and the average bader charge of Co layer.

| Atom     | bader charge transfer (e) |
|----------|---------------------------|
| Co (CoP) | 0.258                     |
| Co (Co)  | -0.089                    |
| P        | 0.169                     |

**Table S2.** Comparison of HER and OER performances of reported electrocatalyst in 1.0 M KOH for water splitting.

| Catalysts                                        |     | Electrolyte<br>(KOH) | Loading<br>mass<br>(mg cm <sup>-2</sup> ) | J<br>(mA<br>cm <sup>-2</sup> ) | $\eta$<br>(mV vs<br>RHE) | Tafel<br>Slope<br>(mV/dec) | Overall<br>voltage<br>(V)@10m<br>A cm <sup>-2</sup> | Ref       |
|--------------------------------------------------|-----|----------------------|-------------------------------------------|--------------------------------|--------------------------|----------------------------|-----------------------------------------------------|-----------|
| CoP/NCNHP                                        | HER | 1 M                  | 2                                         | -10                            | 115                      | 66                         | 1.64                                                | [1]       |
|                                                  | OER |                      |                                           | 10                             | 310                      | 70                         |                                                     |           |
| Hollow Mo-CoP nanoarrays                         | HER | 1 M                  | 2.5                                       | -10                            | 40                       | 65                         | 1.56                                                | [2]       |
|                                                  | OER |                      |                                           | 10                             | 305                      | 56                         |                                                     |           |
| Carbon tubes/<br>cobalt-sulfide                  | HER | 1 M                  | 0.32                                      | -10                            | 190                      | 131                        | 1.743                                               | [3]       |
|                                                  | OER |                      |                                           | 10                             | 306                      | 72                         |                                                     |           |
| CoP/GO-400                                       | HER | 1 M                  | 0.28                                      | -10                            | 150                      | 38                         | 1.7                                                 | [4]       |
|                                                  | OER |                      |                                           | 10                             | 340                      | 66                         |                                                     |           |
| CoP/PNC                                          | HER | 1 M                  | 0.57                                      | -10                            | 165                      | 70                         | 1.68                                                | [5]       |
|                                                  | OER |                      |                                           | 10                             | 300                      | 77                         |                                                     |           |
| CoP@NPMG                                         | HER | 1 M                  | 2.5                                       | -10                            | 150                      | 75                         | 1.58                                                | [6]       |
|                                                  | OER |                      |                                           | 10                             | 276                      | 54                         |                                                     |           |
| Mn-CoP<br>nanosheets                             | HER | 1 M                  | -                                         | -10                            | 195                      | 69                         | -                                                   | [7]       |
|                                                  | OER |                      |                                           | 10                             | 290                      | 76                         |                                                     |           |
| CoP/Co <sub>2</sub> P                            | HER | 1 M                  | 0.36                                      | -10                            | 103                      | 61.2                       | 1.65                                                | [8]       |
|                                                  | OER |                      |                                           | 10                             | 317                      | 58.9                       |                                                     |           |
| NC-CNT/CoP                                       | HER | 1 M                  | 1.5                                       | -10                            | 120                      | 73                         | 1.63                                                | [9]       |
|                                                  | OER |                      |                                           | 10                             | 240                      | 76                         |                                                     |           |
| Co/CoP                                           | HER | 1 M                  | 0.22                                      | -10                            | 253                      | 73.8                       | 1.8                                                 | [10]      |
|                                                  | OER |                      |                                           | 10                             | 340                      | 79.5                       |                                                     |           |
| P-Co <sub>3</sub> O <sub>4</sub>                 | HER | 1 M                  | 0.4                                       | -10                            | 120                      | 52                         | 1.76( $\eta_{50}$ )                                 | [11]      |
|                                                  | OER |                      |                                           | 10                             | 280                      | 69.8                       |                                                     |           |
| Ni <sub>5</sub> P <sub>4</sub>                   | HER | 1 M                  | -                                         | -10                            | 150                      | 53                         | 1.7                                                 | [12]      |
|                                                  | OER |                      |                                           | 10                             | 290                      | 40                         |                                                     |           |
| NiCoN-1H/CC                                      | HER | 1 M                  | -                                         | -10                            | 145                      | 105.2                      | 1.8( $\eta_{13}$ )                                  | [13]      |
|                                                  | OER |                      |                                           | 10                             | 360                      | 46.9                       |                                                     |           |
| CoSe <sub>2</sub> NS@CP                          | HER | 1 M                  | 0.16                                      | -10                            | -                        | -                          | 1.75                                                | [14]      |
|                                                  | OER |                      |                                           | 10                             | 350                      | 34.5                       |                                                     |           |
| Fe <sub>3</sub> O <sub>4</sub> -CoP <sub>x</sub> | HER | 1 M                  | -                                         | -10                            | 177                      | 65                         | 1.75                                                | [15]      |
|                                                  | OER |                      |                                           | 10                             | 331                      | 122                        |                                                     |           |
| Co <sub>0.85</sub> Se@NC                         | HER | 1 M                  | 0.4                                       | -10                            | 230                      | 125                        | 1.76                                                | [16]      |
|                                                  | OER |                      |                                           | 10                             | 32                       | 75                         |                                                     |           |
| CNTs@CoP                                         | HER | 1 M                  | 0.35                                      | -10                            | 169                      | 70                         | 1.74                                                | This work |
|                                                  | OER |                      |                                           | 10                             | 321                      | 58                         |                                                     |           |
| SSUCo-900                                        | HER | 1 M                  | 0.45                                      | -10                            | 247                      | 86                         | 1.88                                                | [17]      |
|                                                  | OER |                      |                                           | 10                             | 337                      | -                          |                                                     |           |

**Table S3.** Representative electrocatalytic hydrogen evolution coupled with organic oxidation reactions in aqueous media.

| Catalyst                                                   | Electrolyte<br>(KOH) | Organic<br>substrate               | $\eta_{\text{HER}}(\text{V})$<br>@10mA<br>$\text{cm}^{-2}$ | $\eta_{\text{OER}}(\text{V})$<br>@10mA<br>$\text{cm}^{-2}$ | $\eta_{\text{OERorganic}}(\text{V})$<br>)<br>@10mA $\text{cm}^{-2}$ | Overall<br>voltage (V)<br>@10mA $\text{cm}^{-2}$ | Overall voltage<br>organic (V)<br>@10mA $\text{cm}^{-2}$ | Ref          |
|------------------------------------------------------------|----------------------|------------------------------------|------------------------------------------------------------|------------------------------------------------------------|---------------------------------------------------------------------|--------------------------------------------------|----------------------------------------------------------|--------------|
| S-MnO <sub>2</sub> /NF                                     | 1 M                  | 0.5 M urea                         | -                                                          | -                                                          | 1.33                                                                | -                                                | 1.41                                                     | [18]         |
| Ni <sub>2</sub> P/NF                                       | 1 M                  | 0.5 M<br>Hydrazine                 | -0.29( $\eta_{200}$ )                                      | -                                                          | 0.018( $\eta_{200}$ )                                               | 1.6( $\eta_{20}$ )                               | 1.0( $\eta_{500}$ )                                      | [19]         |
| Ni <sub>2</sub> P NPA/NF                                   | 1 M                  | 10 mM<br>HMF                       | -0.15                                                      | 1.5(onset)                                                 | 1.35(onset)                                                         | 1.65                                             | 1.44                                                     | [20]         |
| Fe <sub>2</sub> P/SSM                                      | 10 M                 | 0.5 M<br>glucose                   | -                                                          | 1.43(onset)                                                | 1.33(onset)                                                         | 1.52                                             | 1.22                                                     | [21]         |
| CoP NWs/CC                                                 | 1 M                  | 40 mg L <sup>-1</sup><br>Triclosan | -0.069                                                     | 1.59                                                       | 1.54                                                                | 1.68                                             | 1.63                                                     | [22]         |
| Fe11.1%-Ni <sub>3</sub> S <sub>2</sub> /NF                 | 1 M                  | 0.33 M urea                        | -0.126                                                     | 1.482( $\eta_{50}$ )                                       | -                                                                   | 1.60                                             | 1.46                                                     | [23]         |
| hp-Ni                                                      | 1 M                  | 10 mM<br>Benzyl<br>alcohol         | -0.219<br>( $\eta_{50}$ )                                  | 1.51                                                       | 1.35                                                                | 1.69                                             | 1.50                                                     | [24]         |
| Ni <sub>3</sub> N NA/CC                                    | 1 M                  | 0.33 M urea                        | -0.136                                                     | 1.57                                                       | 1.35                                                                | 1.56                                             | 1.44                                                     | [25]         |
| CoS <sub>2</sub> NA/Ti                                     | 1 M                  | 0.3 M urea                         | -0.14                                                      | -                                                          | 1.4-1.5                                                             | 1.63                                             | 1.59                                                     | [26]         |
| NC@CuCo <sub>2</sub> N <sub>x</sub> /CF                    | 1 M                  | 15 mM<br>Benzyl<br>alcohol         | -0.105                                                     | 1.46                                                       | 1.25                                                                | -                                                | 1.41                                                     | [27]         |
| NiFeCo LDH/NF                                              | 1 M                  | 0.33 M urea                        | -0.108                                                     | 1.44                                                       | -                                                                   | 1.57                                             | 1.49                                                     | [28]         |
| FQD/CoNi-LDH/NF                                            | 1 M                  | 0.5 M urea                         | -0.15                                                      | 1.57( $\eta_{50}$ )                                        | 1.36                                                                | 1.59                                             | 1.45                                                     | [29]         |
| MoS <sub>2</sub> /Ni <sub>3</sub> S <sub>2</sub> /NiFe-LDH | 1 M                  | 0.5 M urea                         | -<br>0.261( $\eta_{100}$ )                                 | 1.544( $\eta_{100}$ )                                      | 1.396( $\eta_{100}$ )                                               | 1.559( $\eta_{50}$ )                             | 1.343( $\eta_{50}$ )                                     | [30]         |
| Ni-Co <sub>9</sub> S <sub>8</sub> /CC                      | 1 M                  | 0.33 M urea                        | -<br>0.295( $\eta_{100}$ )                                 | 1.43                                                       | 1.28                                                                | 1.81                                             | 1.52                                                     | [31]         |
| Co <sub>x</sub> -Ni(OH) <sub>2</sub> NPs/CF                | 1 M                  | 0.5 M urea                         | -0.106                                                     | 1.56( $\eta_{100}$ )                                       | 1.3                                                                 | 1.73                                             | 1.37                                                     | [32]         |
| CoMn/CoMn <sub>2</sub> O <sub>4</sub>                      | 1 M                  | 0.5 M urea                         | -0.069                                                     | 1.61( $\eta_{100}$ )                                       | 1.36( $\eta_{100}$ )                                                | 1.64                                             | 1.51                                                     | [33]         |
| CNTs@Co/CoP <sub>300m</sub><br>g                           | 1 M                  | 0.5 M<br>glucose                   | -0.169                                                     | 1.55                                                       | 1.22                                                                | 1.74                                             | 1.42                                                     | This<br>work |

## References

1. Pan, Y.; Sun, K.; Liu, S.; Cao, X.; Wu, K.; Cheong, W.-C.; Chen, Z.; Wang, Y.; Li, Y.; Liu, Y.; Wang, D.; Peng, Q.; Chen, C.; Li, Y., *J. Am. Chem. Soc.* **2018**, *140* (7), 2610-2618.
2. Guan, C.; Xiao, W.; Wu, H.; Liu, X.; Zang, W.; Zhang, H.; Ding, J.; Feng, Y. P.; Pennycook, S. J.; Wang, J., *Nano Energy* **2018**, *48*, 73-80.
3. Zhang, X.; Wang, J.; Zhong, H.; Wang, Z.; Meng, F., *Acs Nano* **2016**, *10*, 2342-2348.
4. Jiao, L.; Zhou, Y.-X.; Jiang, H.-L., *Chem. Sci.* **2016**, *7* (3), 1690-1695.
5. Peng, Z.; Yu, Y.; Jiang, D.; Wu, Y.; Xia, B. Y.; Dong, Z., *Carbon* **2019**, *144*, 464-471.
6. Liu, Y.; Zhu, Y.; Shen, J.; Huang, J.; Yang, X.; Li, C., *Nanoscale* **2018**, *10* (5), 2603-2612.
7. Li, Y.; Jia, B.; Chen, B.; Liu, Q.; Cai, M.; Xue, Z.; Fan, Y.; Wang, H.-P.; Su, C.-Y.; Li, G., *Dalton T.* **2018**, *47* (41), 14679-14685.
8. Chen, L.; Zhang, Y.; Wang, H.; Wang, Y.; Li, D.; Duan, C., *Nanoscale* **2018**, *10* (45), 21019-21024.
9. Guan, C.; Wu, H.; Ren, W.; Yang, C.; Liu, X.; Ouyang, X.; Song, Z.; Zhang, Y.; Pennycook, S. J.; Cheng, C.; Wang, J., *J. Mater. Chem. A* **2018**, *6* (19), 9009-9018.
10. Xue, Z.-H.; Su, H.; Yu, Q.-Y.; Zhang, B.; Wang, H.-H.; Li, X.-H.; Chen, J.-S., *Adv. Energy Mater.* **2017**, *7* (12), 1602355.
11. Xiao, Z.; Wang, Y.; Huang, Y.-C.; Wei, Z.; Dong, C.-L.; Ma, J.; Shen, S.; Li, Y.; Wang, S., *Energ. Environ. Sci.* **2017**, *10* (12), 2563-2569.
12. Ledendecker, M.; Krick Calderón, S.; Papp, C.; Steinrück, H.-P.; Antonietti, M.; Shalom, M., *Angew. Chem. Int. Ed.* **2015**, *54* (42), 12361-12365.
13. Han, L.; Feng, K.; Chen, Z., *Energy Technol.* **2017**, *5* (11), 1908-1911.
14. Zhou, Y.; Xiao, H.; Zhang, S.; Li, Y.; Wang, S.; Wang, Z.; An, C.; Zhang, J., *Electrochim. Acta* **2017**, *241*, 106-115.
15. Guo, B.; Sun, J.; Hu, X.; Wang, Y.; Sun, Y.; Hu, R.; Yu, L.; Zhao, H.; Zhu, J., *ACS Appl. Nano Mater.* **2019**, *2* (1), 40-47.
16. Meng, T.; Qin, J.; Wang, S.; Zhao, D.; Mao, B.; Cao, M., *J. Mater. Chem. A* **2017**, *5* (15), 7001-7014.
17. Zhang, G.; Wang, P.; Lu, W.-T.; Wang, C.-Y.; Li, Y.-K.; Ding, C.; Gu, J.; Zheng, X.-S.; Cao, F.-F., *ACS Appl. Mater. Inter.* **2017**, *9* (34), 28566-28576.
18. Chen, S.; Duan, J.; Vasileff, A.; Qiao, S. Z., *Angew. Chem. Int. Ed.* **2016**, *55* (11), 3804-3808.
19. Tang, C.; Zhang, R.; Lu, W.; Wang, Z.; Liu, D.; Hao, S.; Du, G.; Asiri, A. M.; Sun, X.,



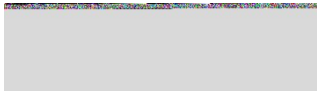

*Angew. Chem. Int. Ed.* **2017**, *56* (3), 842-846.

20. You, B.; Jiang, N.; Liu, X.; Sun, Y., *Angew. Chem. Int. Ed.* **2016**, *55* (34), 9913-9917.
21. Du, P.; Zhang, J.; Liu, Y.; Huang, M., *Electrochem. Commun.* **2017**, *83*, 11-15.
22. Lyu, C.; Zheng, J.; Zhang, R.; Zou, R.; Liu, B.; Zhou, W., *Mater. Chem. Front.* **2018**, *2* (2), 323-330.
23. Zhu, W.; Yue, Z.; Zhang, W.; Hu, N.; Luo, Z.; Ren, M.; Xu, Z.; Wei, Z.; Suo, Y.; Wang, J., *J. Mater. Chem. A* **2018**, *6* (10), 4346-4353.
24. You, B.; Liu, X.; Liu, X.; Sun, Y., *ACS Catal.* **2017**, *7* (7), 4564-4570.
25. Liu, Q.; Xie, L.; Qu, F.; Liu, Z.; Du, G.; Asiri, A. M.; Sun, X., *Inorg. Chem. Front.* **2017**, *4* (7), 1120-1124.
26. Wei, S.; Wang, X.; Wang, J.; Sun, X.; Cui, L.; Yang, W.; Zheng, Y.; Liu, J., *Electrochim. Acta* **2017**, *246*, 776-782.
27. Zheng, J.; Chen, X.; Zhong, X.; Li, S.; Liu, T.; Zhuang, G.; Li, X.; Deng, S.; Mei, D.; Wang, J.-G., *Adv. Funct. Mater.* **2017**, *27* (46), 1704169.
28. Babar, P.; Lokhande, A.; Karade, V.; Pawar, B.; Gang, M. G.; Pawar, S.; Kim, J. H., *ACS Sustain. Chem. Eng.* **2019**, *7* (11), 10035-10043.
29. Feng, Y.; Wang, X.; Huang, J.; Dong, P.; Ji, J.; Li, J.; Cao, L.; Feng, L.; Jin, P.; Wang, C., *Chem. Eng. J.* **2020**, *390*, 124525.
30. He, M.; Hu, S.; Feng, C.; Wu, H.; Liu, H.; Mei, H., *Int. J. Hydrog. Energy* **2020**, *45* (1), 23-35.
31. Hao, P.; Zhu, W.; Li, L.; Tian, J.; Xie, J.; Lei, F.; Cui, G.; Zhang, Y.; Tang, B., *Electrochim. Acta* **2020**, *338*, 135883.
32. Sun, C. B.; Guo, M. W.; Siwal, S. S.; Zhang, Q. B., *J. Catal.* **2020**, *381*, 454-461.
33. Wang, C.; Lu, H.; Mao, Z.; Yan, C.; Shen, G.; Wang, X., *Adv. Funct. Mater.* **2020**, *30* (21), 2000556.
